# Supplementary material
Source: PubMed Central journal article supplement (PMC10524216)

**Fig. S1**

**A. CD14 binding with RSV**

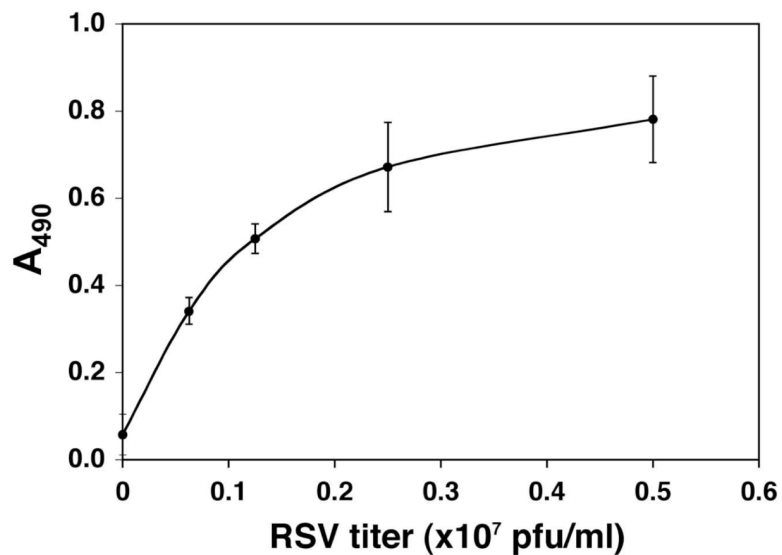

**B. POPG effect on CD14 binding with RSV**

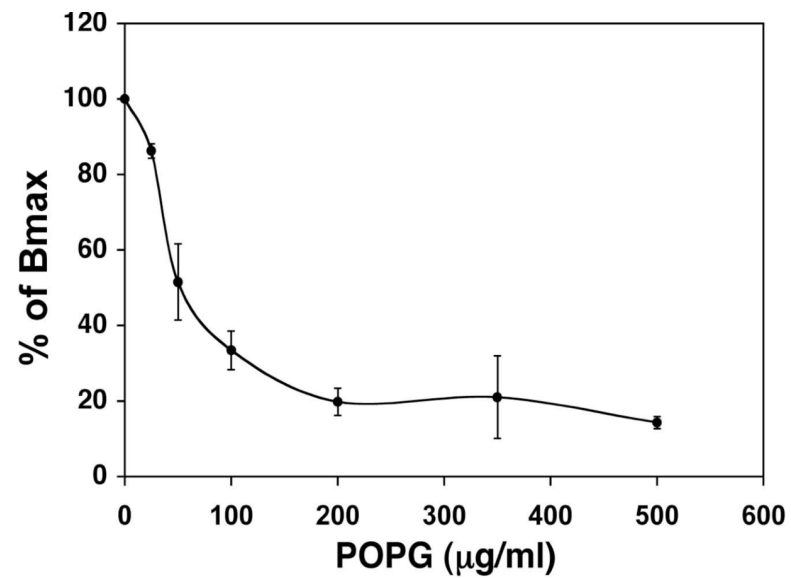

**C.**

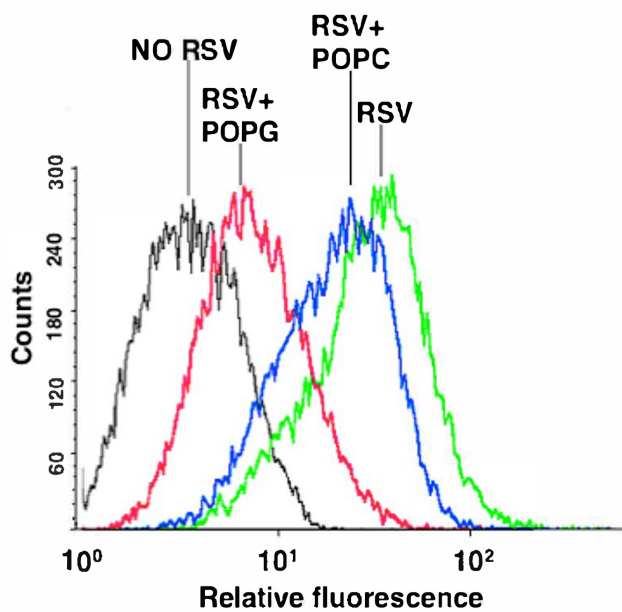

**D.**

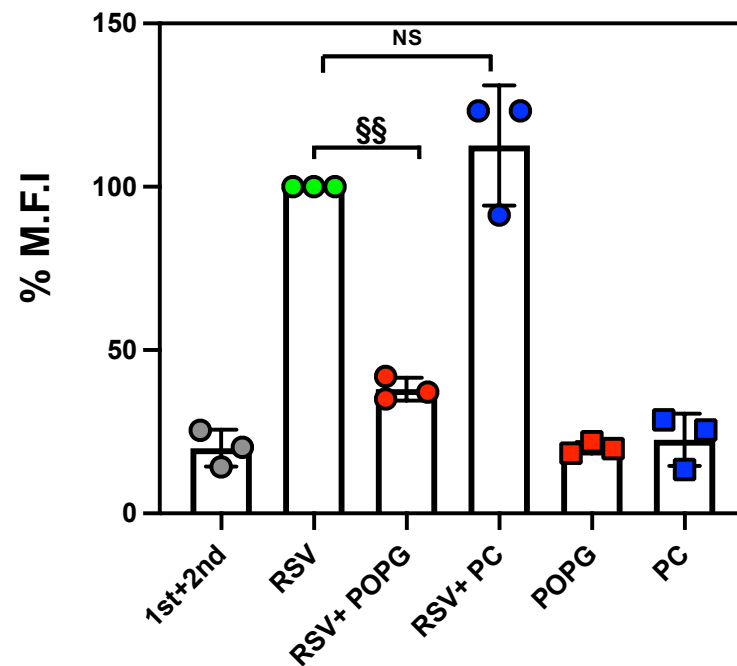

Supplement: NIHMS1892855-supplement-Suppinfo.pdf [file NIHMS1892855-supplement-Suppinfo.pdf]
